# Supplementary material
Source: publisher site journal article supplement (https://www.dovepress.com/article/205119)

## Supplementary Material 1

**Supplementary Material 1:** Information requested from the Danish ADR Database, when applying for a data export

**Notes:** The application to the DKMA was written in Danish (left column). A translated list of the requested information was written afterwards (right column)

**Abbreviations:** ADR, adverse drug reaction; CPR, personal identification number; DKMA, Danish Medicines Agency

| Danish (original)                                                                        | English (translation)                                                                    |
|------------------------------------------------------------------------------------------|------------------------------------------------------------------------------------------|
| Om der er indberettet en bivirkning (ja/nej).                                            | If an ADR has been reported (yes/no)                                                     |
| Hvem der har indberettet bivirkningen.                                                   | Who reported the ADR                                                                     |
| Hvorfra bivirkningen er indberettet (hospital, afdeling, egen læge, speciallæge-praksis) | Where the ADR was reported from (hospital, department, general practitioner, specialist) |
| Andel af anonyme indberetninger i bivirkningsdatabasen                                   | Share of anonymous reports in the ADR database                                           |
| Modtagedato                                                                              | Date of receiving the report                                                             |
| Lægemiddelnavn                                                                           | Name of medication                                                                       |
| Bivirkning                                                                               | Name of ADR                                                                              |
| Organklasse                                                                              | Which organs are affected                                                                |
| Er patienten kommet sig?                                                                 | Has the patient recovered                                                                |
| Alvorlighed                                                                              | Severity                                                                                 |
| Dødsfald                                                                                 | Whether the ADR was fatal                                                                |
| Køn                                                                                      | Gender                                                                                   |
| Fødselsår                                                                                | Birthdate                                                                                |
| CPR nr.                                                                                  | CPR number                                                                               |
| Alder i år                                                                               | Age in years                                                                             |
| Beregnet alder                                                                           | Calculated age                                                                           |
| Aldersgruppe                                                                             | Age group                                                                                |
| Lægemiddel startdato                                                                     | Date of initiating treatment                                                             |
| Indikation                                                                               | Indication for treatment                                                                 |
| Bivirknings startdato                                                                    | Date of ADR start                                                                        |
| Spontan indberetning                                                                     | Whether the report was spontaneous                                                       |
| Medicinsk bekræftet                                                                      | Whether the ADR has been medically confirmed                                             |

## Supplementary Material 2

**Supplementary Material 2:** Terms used to search the Danish ADR Database for angioedema related ADR reports

**Notes:** List made using MedDRA. Highlighted terms returned results.

**Abbreviations:** ADR, adverse drug reaction

|                        |                            |
|------------------------|----------------------------|
| Allergic oedema        | Lip oedema                 |
| Angioedema             | Lip swelling               |
| Circumoral oedema      | Mouth swelling             |
| Conjunctival oedema    | Oculo-respiratory syndrome |
| Corneal oedema         | Oedema mouth               |
| Epiglottic oedema      | Oropharyngeal oedema       |
| Eye oedema             | Oropharyngeal swelling     |
| Eye swelling           | Palatal oedema             |
| Eyelid oedema          | Palatal swelling           |
| Face oedema            | Periorbital oedema         |
| Gingival oedema        | Pharyngeal oedema          |
| Gingival swelling      | Scleral oedema             |
| Gleich's syndrome      | Swelling face              |
| Hereditary angioedema  | Swollen tongue             |
| Idiopathic angioedema  | Tongue oedema              |
| Idiopathic urticaria   | Tracheal oedema            |
| Intestinal angioedema  | Urticaria                  |
| Laryngeal oedema       | Urticaria cholinergic      |
| Laryngotracheal oedema | Urticaria chronic          |
| Limbal swelling        | Urticaria papular          |

### Supplementary Material 3

**Supplementary Material 3:** Total number of ACEi-AE reports to the DKMA and number of reports to the DKMA including full CPR numbers each year, respectively

**Abbreviations:** ACEi-AE, ACE-inhibitor related angioedema; DKMA, Danish Medicines Agency; CPR, personal identification number

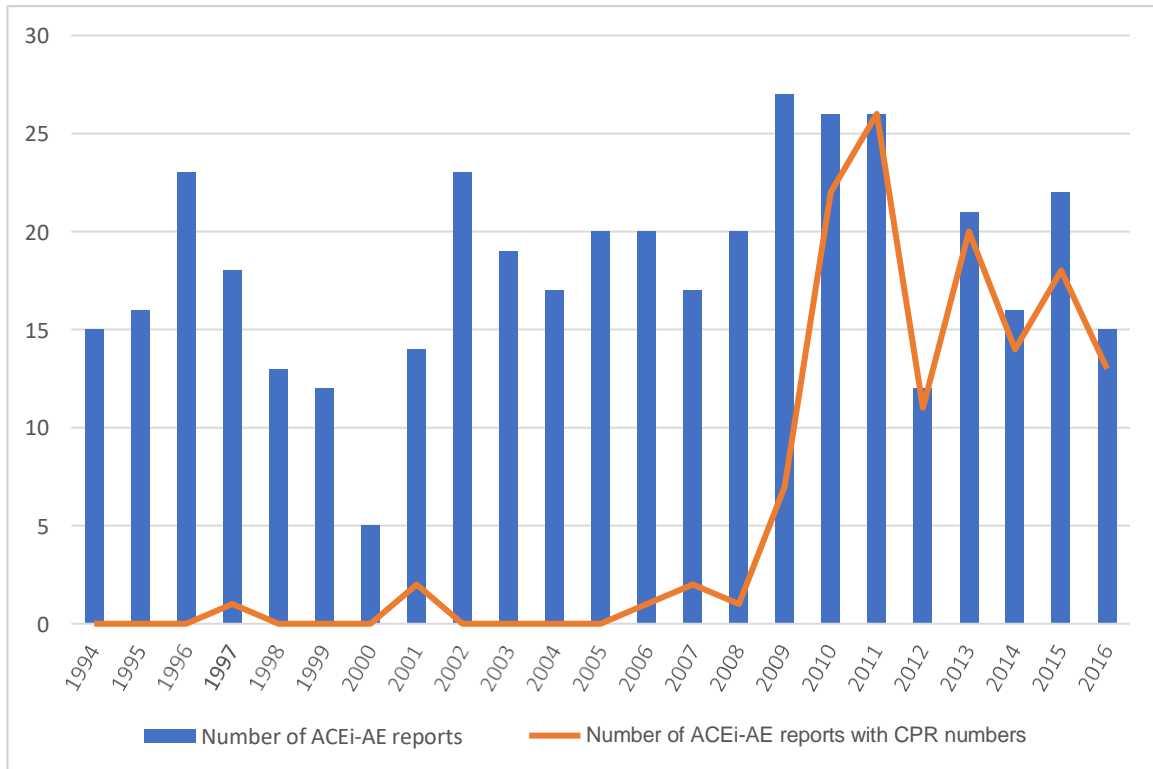

#### Supplementary Material 4

**Supplementary Material 4:** Distribution of ACEi substances related to ACEi-AE reports to the DKMA (1994-2016)

**Notes:** Numbers represent calculated means for all years

**Abbreviations:** ACEi, ACE-inhibitor; ACEi-AE, ACE-inhibitor related angioedema; DKMA, Danish Medicines Agency

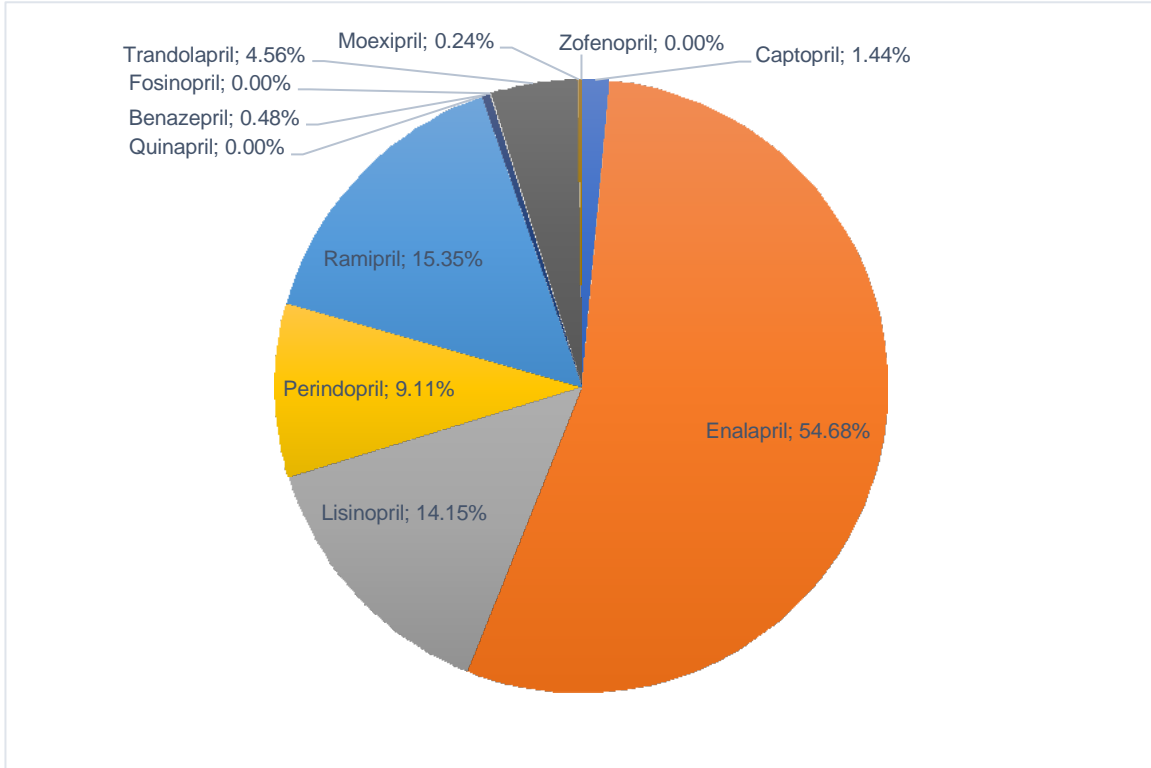

## Supplementary Material 5

### Supplementary Material 5: ACEi substances related to ACEi-AE reports to the DKMA (1994-2016)

**Abbreviations:** ACEi, ACE-inhibitor; ACEi-AE, ACE-inhibitor related angioedema; DKMA, Danish Medicines Agency

| Year         | Number of reports |              |               |               |              |              |               |              |             |
|--------------|-------------------|--------------|---------------|---------------|--------------|--------------|---------------|--------------|-------------|
|              | Benazepril        | Captopril    | Enalapril     | Lisinopril    | Moexipril    | Perindopril  | Ramipril      | Trandolapril | Total       |
| 1994         |                   | 1            | 7             | 4             |              | 1            | 1             | 1            | 15          |
| 1995         |                   | 1            | 6             | 7             |              | 1            |               | 1            | 16          |
| 1996         |                   | 1            | 13            | 5             |              | 1            | 1             | 2            | 23          |
| 1997         |                   | 1            | 7             | 4             | 1            | 1            | 2             | 2            | 18          |
| 1998         |                   | 1            | 7             | 1             |              |              | 2             | 2            | 13          |
| 1999         |                   |              | 3             | 3             |              | 2            | 3             | 1            | 12          |
| 2000         |                   |              | 1             | 1             |              | 1            | 1             | 1            | 5           |
| 2001         |                   |              | 4             | 3             |              | 4            | 3             |              | 14          |
| 2002         |                   | 1            | 15            |               |              | 3            | 4             |              | 23          |
| 2003         |                   |              | 10            | 3             |              | 2            | 3             | 1            | 19          |
| 2004         |                   |              | 8             | 5             |              | 1            | 2             | 1            | 17          |
| 2005         |                   |              | 9             | 2             |              | 3            | 3             | 3            | 20          |
| 2006         |                   |              | 13            | 1             |              | 5            | 1             |              | 20          |
| 2007         |                   |              | 10            |               |              | 3            | 4             |              | 17          |
| 2008         |                   |              | 11            | 1             |              | 5            | 3             |              | 20          |
| 2009         | 2                 |              | 16            | 2             |              | 2            | 5             |              | 27          |
| 2010         |                   |              | 16            | 5             |              | 1            | 3             | 1            | 26          |
| 2011         |                   |              | 14            | 4             |              |              | 6             | 2            | 26          |
| 2012         |                   |              | 9             | 2             |              |              | 1             |              | 12          |
| 2013         |                   |              | 11            | 1             |              | 2            | 7             |              | 21          |
| 2014         |                   |              | 12            | 2             |              |              | 1             | 1            | 16          |
| 2015         |                   |              | 14            | 2             |              |              | 6             |              | 22          |
| 2016         |                   |              | 12            | 1             |              |              | 2             |              | 15          |
| <b>Total</b> | <b>2</b>          | <b>6</b>     | <b>228</b>    | <b>59</b>     | <b>1</b>     | <b>38</b>    | <b>64</b>     | <b>19</b>    | <b>417</b>  |
| <b>%</b>     | <b>0.48%</b>      | <b>1.44%</b> | <b>54.68%</b> | <b>14.15%</b> | <b>0.24%</b> | <b>9.11%</b> | <b>15.35%</b> | <b>4.56%</b> | <b>100%</b> |

### Supplementary Material 6

**Supplementary Material 6:** Distribution of sales numbers of ACEi substances in Denmark (1997-2016)

**Notes:** Pharmaceutical drug sale data is from the MedStat database.<sup>29</sup> Numbers represent calculated means for all years

**Abbreviations:** ACEi, ACE-inhibitor

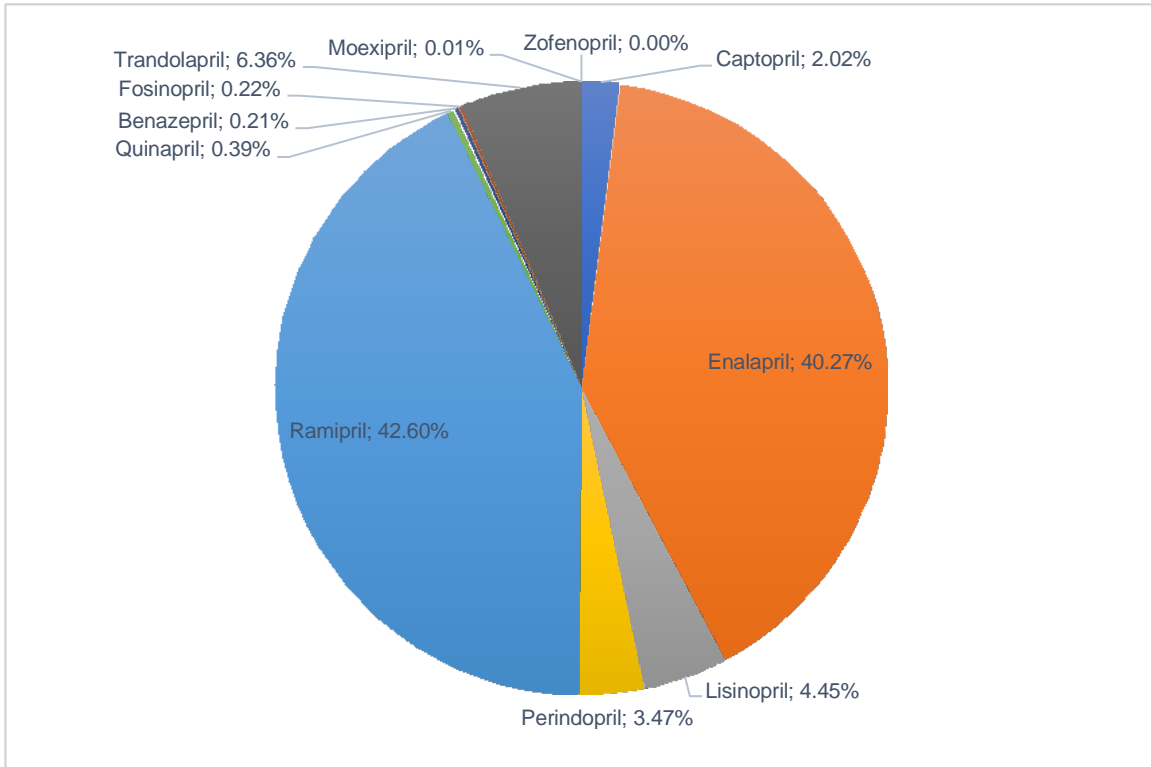

## Supplementary Material 7

### Supplementary Material 7: Sales numbers of ACEi substances in Denmark (1997-2016)

**Notes:** Pharmaceutical drug sale data is from the MedStat database.<sup>29</sup> Numbers represent 1000 DDD's

**Abbreviations:** ACEi, ACE-inhibitor; DDD, defined daily dose

| Year         | Number of sales (1000 DDD) |            |             |              |          |            |             |             |               |            |             |         |
|--------------|----------------------------|------------|-------------|--------------|----------|------------|-------------|-------------|---------------|------------|-------------|---------|
|              | Capto pril                 | Enala pril | Lisin opril | Perindo pril | Ramipril | Quin april | Benaze pril | Fosino pril | Trandola pril | Moexi pril | Zofen opril | Total   |
| 1996         | 0                          | 0          | 0           | 0            | 0        | 0          | 0           | 0           | 0             | 0          | 0           | 0       |
| 1997         | 5596                       | 21241      | 4398        | 2.3          | 8171     | 869        | 631         | 617         | 2768          | 37         | 0           | 44328   |
| 1998         | 5312                       | 21986      | 4455        | 2.45         | 9521     | 841        | 564         | 676         | 3915          | 75         | 0           | 47345   |
| 1999         | 4804                       | 22501      | 4.41        | 2718         | 10788    | 788        | 505         | 597         | 5.4           | 68         | 0           | 42769   |
| 2000         | 4287                       | 23622      | 4346        | 3.37         | 13495    | 775        | 446         | 540         | 6916          | 29         | 0           | 54456   |
| 2001         | 3843                       | 25116      | 4386        | 4329         | 17933    | 756        | 430         | 505         | 8224          | 7          | 0           | 65529   |
| 2002         | 3.42                       | 27321      | 4466        | 5923         | 23566    | 733        | 400         | 469         | 9268          | 0          | 0           | 72146   |
| 2003         | 3083                       | 32115      | 4545        | 7067         | 27974    | 691        | 351         | 436         | 9911          | 0          | 0           | 86173   |
| 2004         | 2741                       | 39863      | 4847        | 8134         | 30409    | 625        | 308         | 394         | 9931          | 0          | 0           | 97252   |
| 2005         | 2402                       | 47383      | 4883        | 9042         | 35204    | 580        | 268         | 254         | 9631          | 0          | 0           | 109647  |
| 2006         | 2139                       | 53908      | 5056        | 9792         | 42414    | 507        | 243         | 156         | 9132          | 0          | 0           | 123347  |
| 2007         | 1869                       | 58976      | 5379        | 10582        | 48389    | 476        | 221         | 102         | 8827          | 0          | 0           | 134821  |
| 2008         | 1657                       | 63.87      | 5.88        | 13.12        | 55573    | 454        | 193         | 72          | 8466          | 0          | 0           | 66415   |
| 2009         | 1446                       | 72887      | 7233        | 8377         | 70355    | 328        | 119         | 43          | 8162          | 0          | 0           | 168950  |
| 2010         | 1248                       | 79175      | 8039        | 2768         | 84302    | 119        | 33          | 14          | 7986          | 0          | 0           | 183684  |
| 2011         | 1069                       | 78.26      | 8184        | 1988         | 88.23    | 67         | 17          | 1           | 7415          | 0          | 0           | 18741   |
| 2012         | 914                        | 77731      | 8.13        | 1585         | 92123    | 51         | 1           | 0           | 6966          | 0          | 0           | 179371  |
| 2013         | 752                        | 75967      | 8162        | 1422         | 93851    | 42         | 0           | 0           | 6582          | 0          | 0           | 186778  |
| 2014         | 647                        | 73777      | 7374        | 1271         | 94396    | 27         | 0           | 0           | 6186          | 0          | 1           | 183679  |
| 2015         | 574                        | 72462      | 6683        | 1154         | 94763    | 1          | 0           | 0           | 5814          | 0          | 0           | 181451  |
| 2016         | 520                        | 70458      | 6584        | 1066         | 95032    | 0          | 0           | 0           | 5415          | 0          | 0           | 179075  |
| <b>Total</b> | 44903                      | 896489     | 99020       | 77218        | 948259   | 8730       | 4730        | 4876        | 141515        | 216        | 1           | 2225957 |
| <b>%</b>     | 2.02%                      | 40.27%     | 4.45%       | 3.47%        | 42.6%    | 0.39%      | 0.21%       | 0.22%       | 6.36%         | 0.01%      | 0%          | 100%    |

## Supplementary Material 8

### Supplementary Material 8: ACEi substances received by cohort patients

**Notes:** Data are known for 141 of 176 patients

**Abbreviations:** ACEi, ACE-inhibitor

| Pharmaceutical                    | Cohort 1 | Cohort 2 | Total (%)   |
|-----------------------------------|----------|----------|-------------|
| Ramipril                          | 18       | 6        | 24 (17.02%) |
| Enalapril                         | 42       | 34       | 76 (53.90%) |
| Trandolapril                      | 2        | 4        | 6 (4.26%)   |
| Lisinopril                        | 13       | 3        | 16 (11.35%) |
| Perindolapril                     | 6        | 1        | 7 (4.96%)   |
| Enalapril and hydrochlorothiazide | 1        | 10       | 11 (7.80%)  |
| Ramipril and perindolapril        | 1        | 0        | 1 (0.71%)   |
| All ACEi's                        | 83       | 58       | 141 (100%)  |



### Supplementary Material 9

**Supplementary Material 9:** Number of Danish individuals receiving an ACEi per 1000 inhabitants each year (1997-2016)

**Notes:** Pharmaceutical drug sales data from the MedStat database<sup>29</sup>

**Abbreviations:** ACEi, ACE-inhibitor

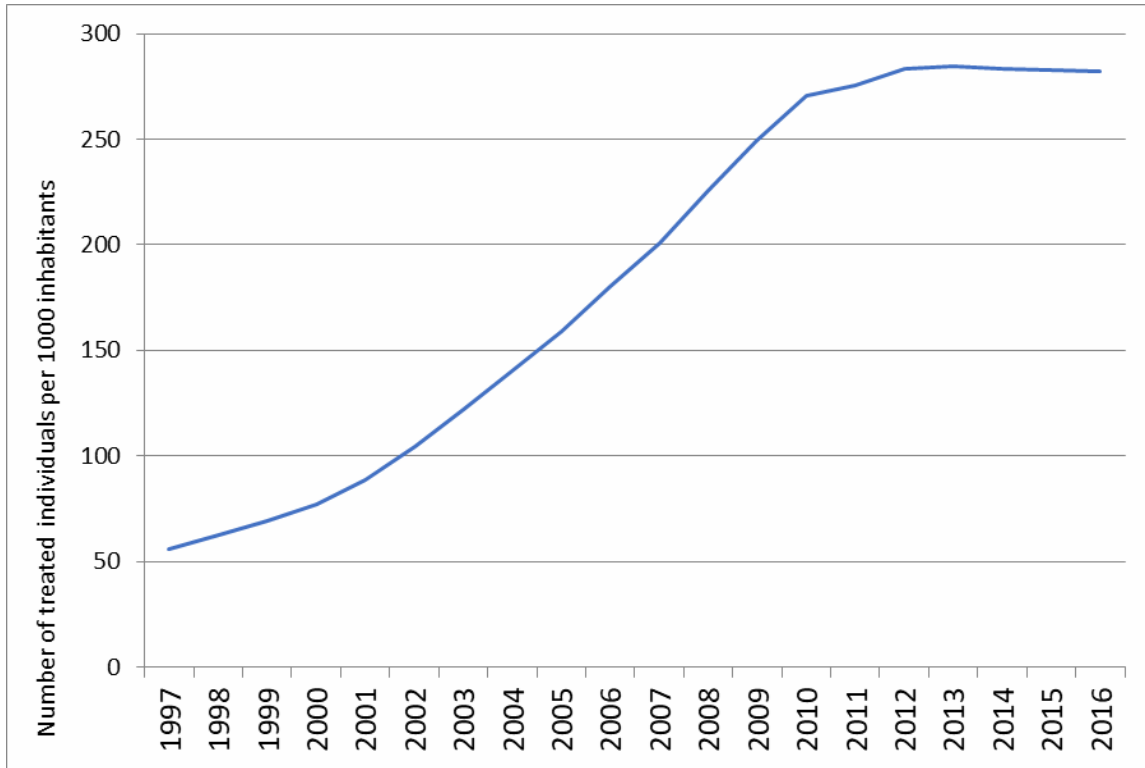

Supplement: Supplementary file 1 [file get_supplementary_file.php]
